# Supplementary material for: A comparative analysis of mitochondrial ORFs provides new insights on expansion of mitochondrial genome size in Arcidae
Source: PubMed Central journal article supplement (PMC9727918; doi:10.1186/s12864-022-09040-3), 2022-12-07

Additional file 7: Secondary structure and relative solvent accessibility of ATP8 and ORFs.

*Alasmidonta heterodon* ATP8

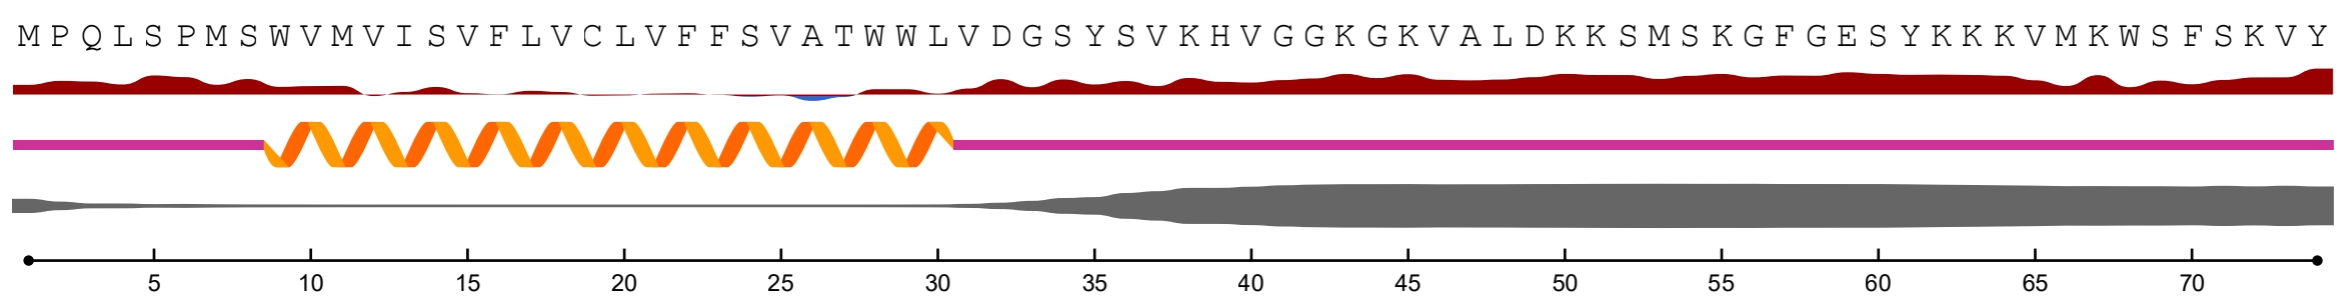

*Lampsilis ornata* ATP8

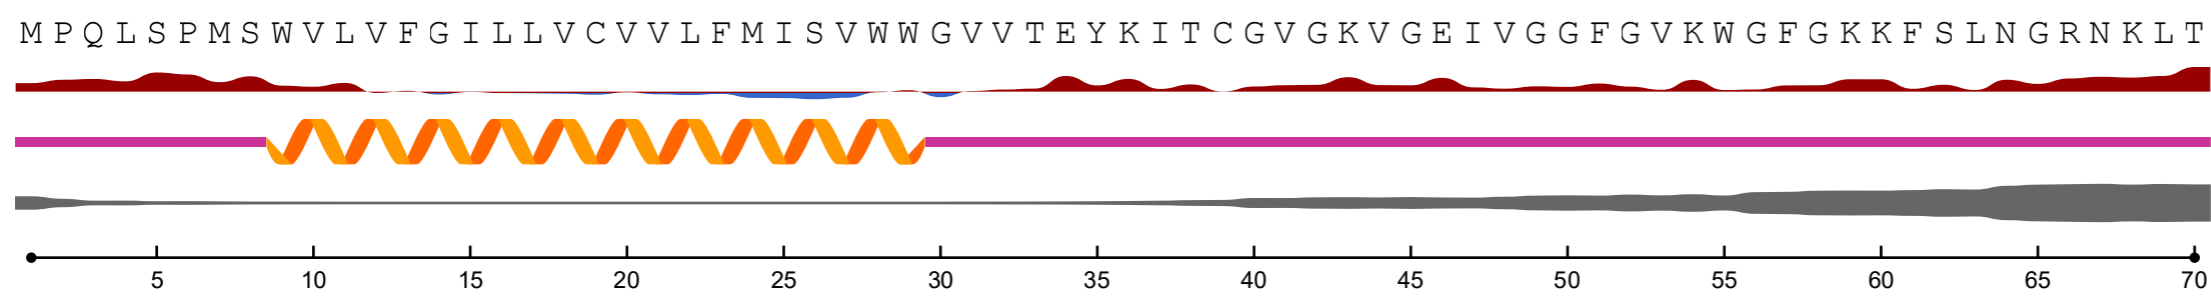

*Lasmigona compressa* ATP8

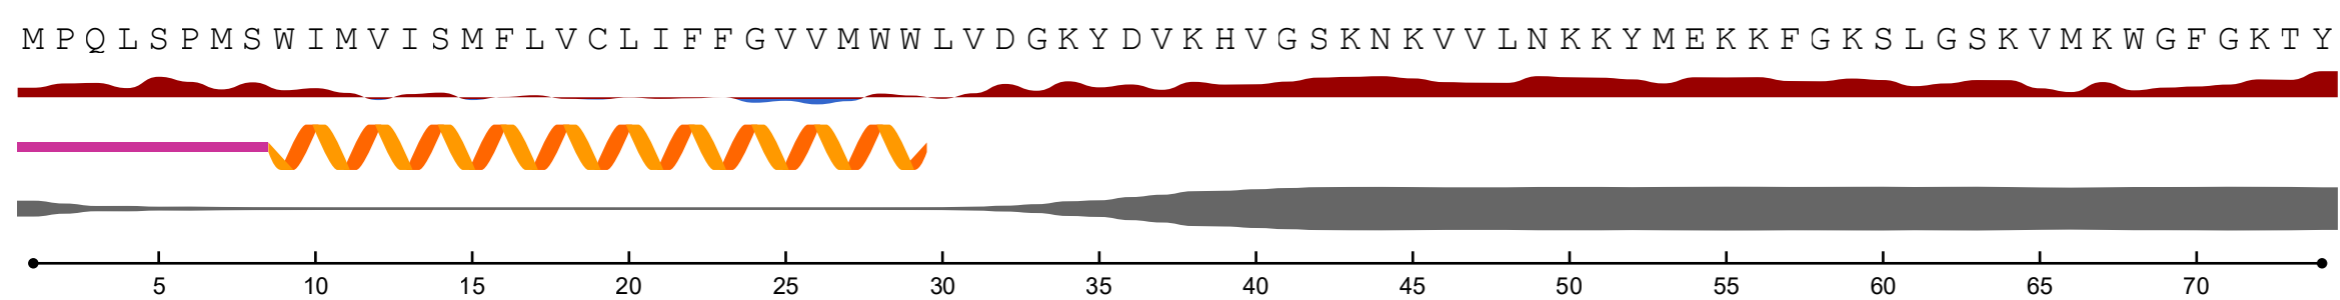

*Mytilus chilensis* ATP8

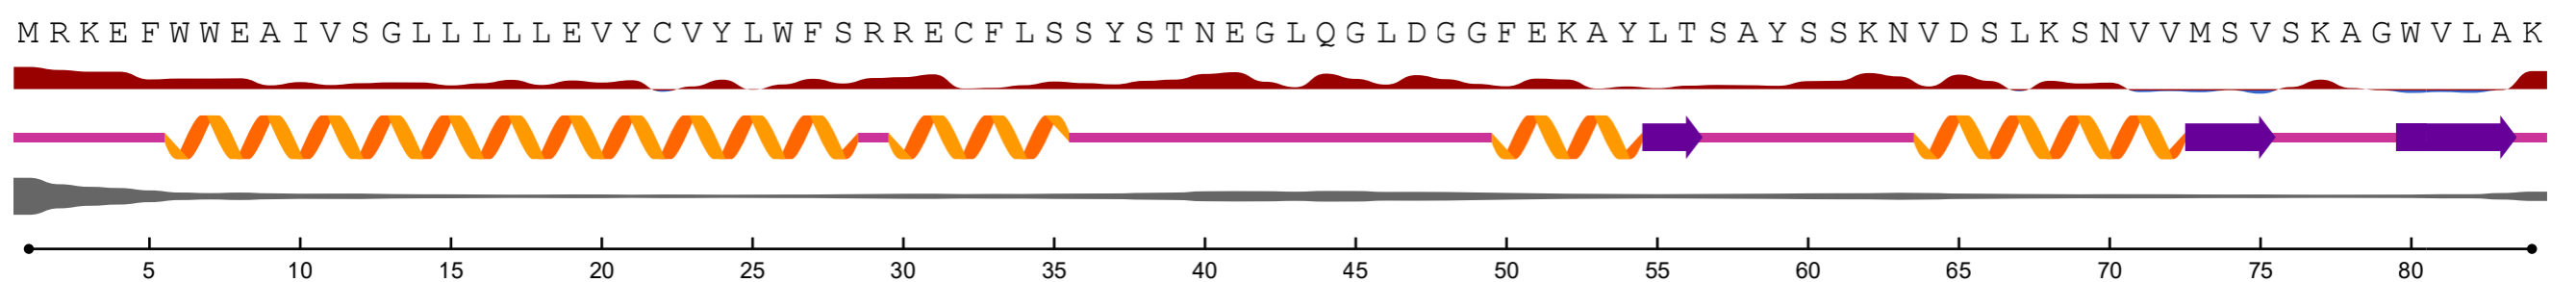

*Mytilus edulis* ATP8

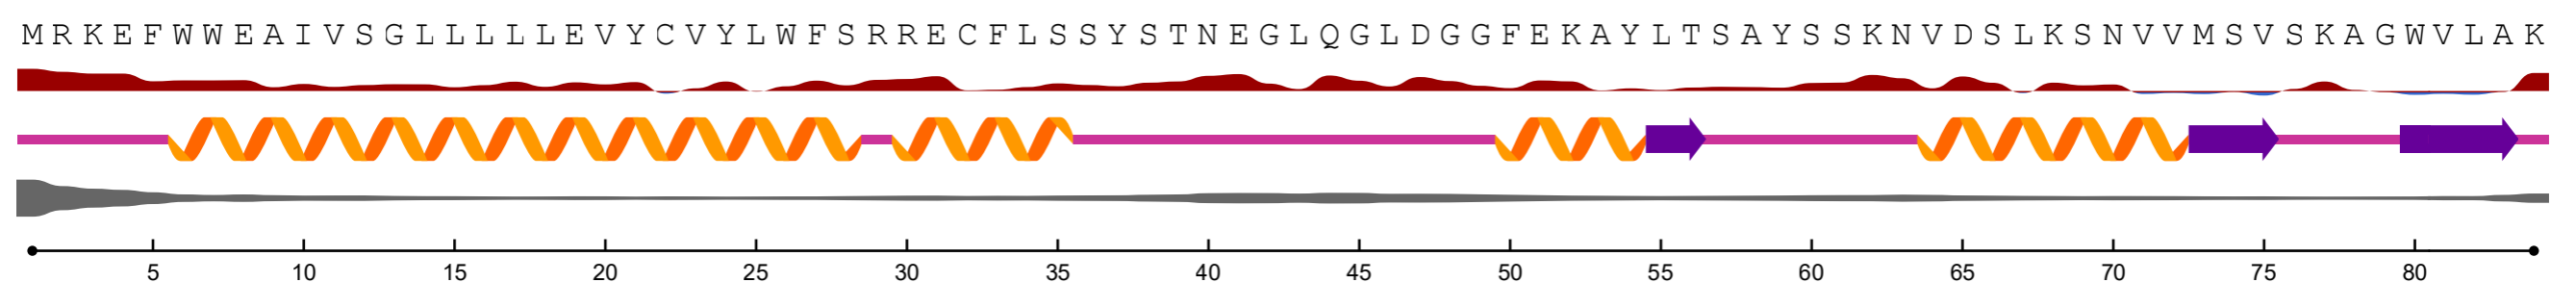

*Mytilus trossulus* ATP8

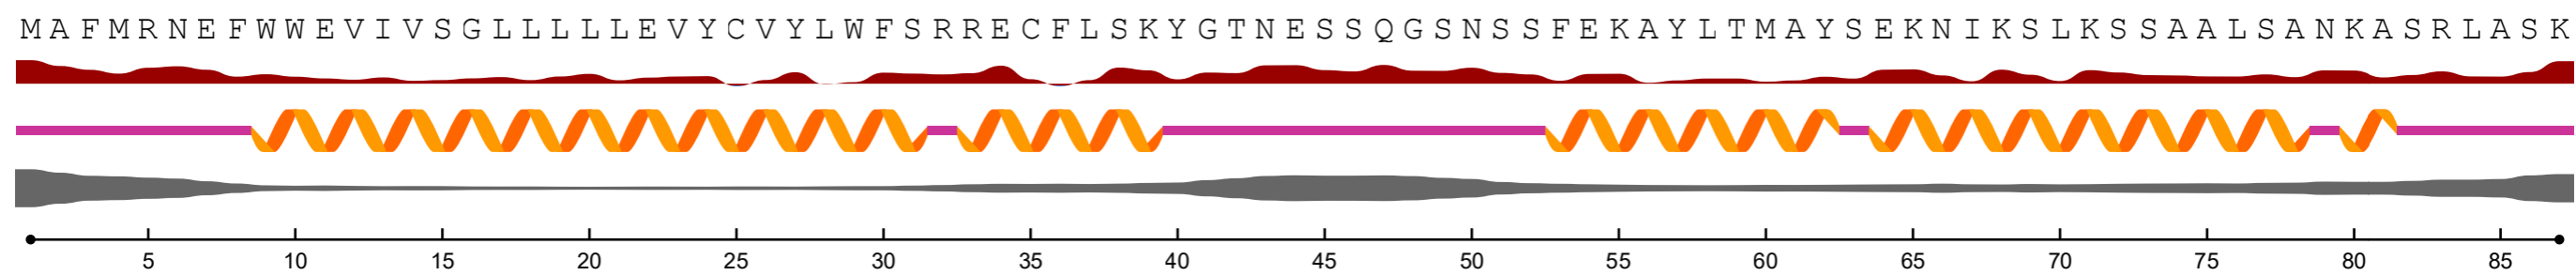

*Scapharca broughtonii* ORF21

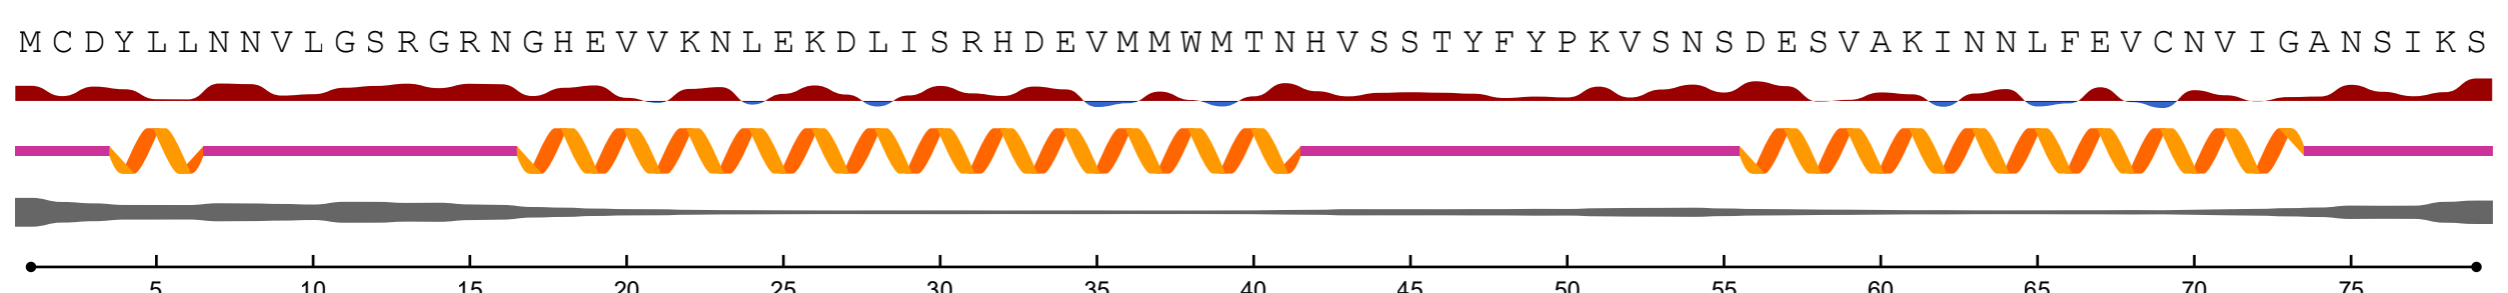

*Scapharca kagoshimensis* ORF21

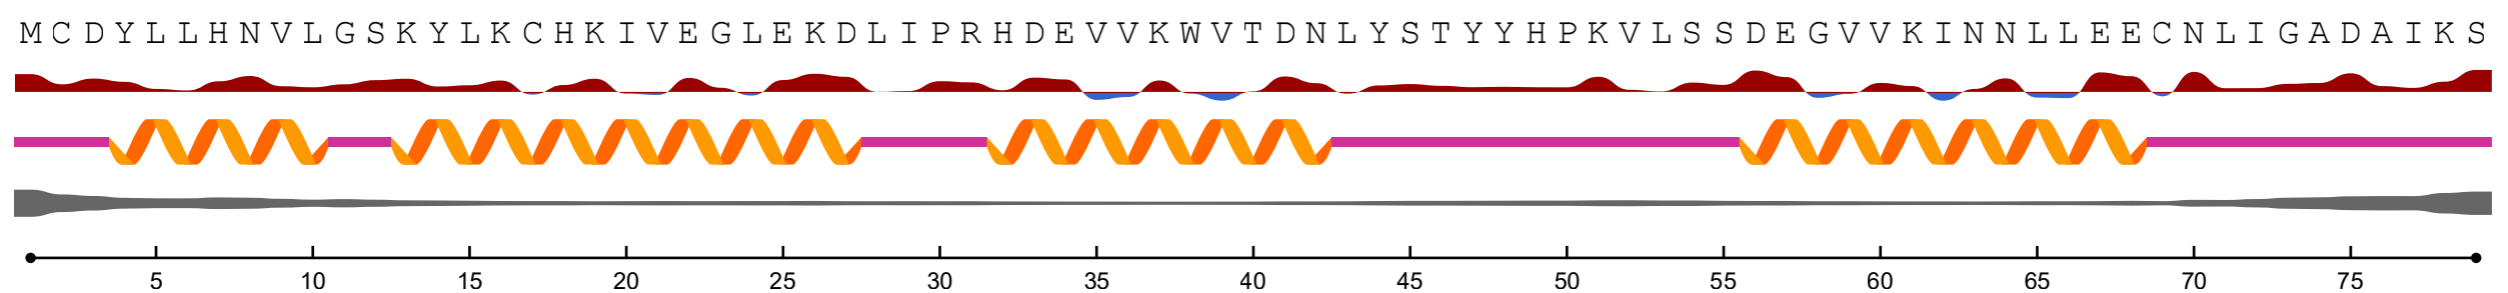

*Scapharca cornea* ORF21

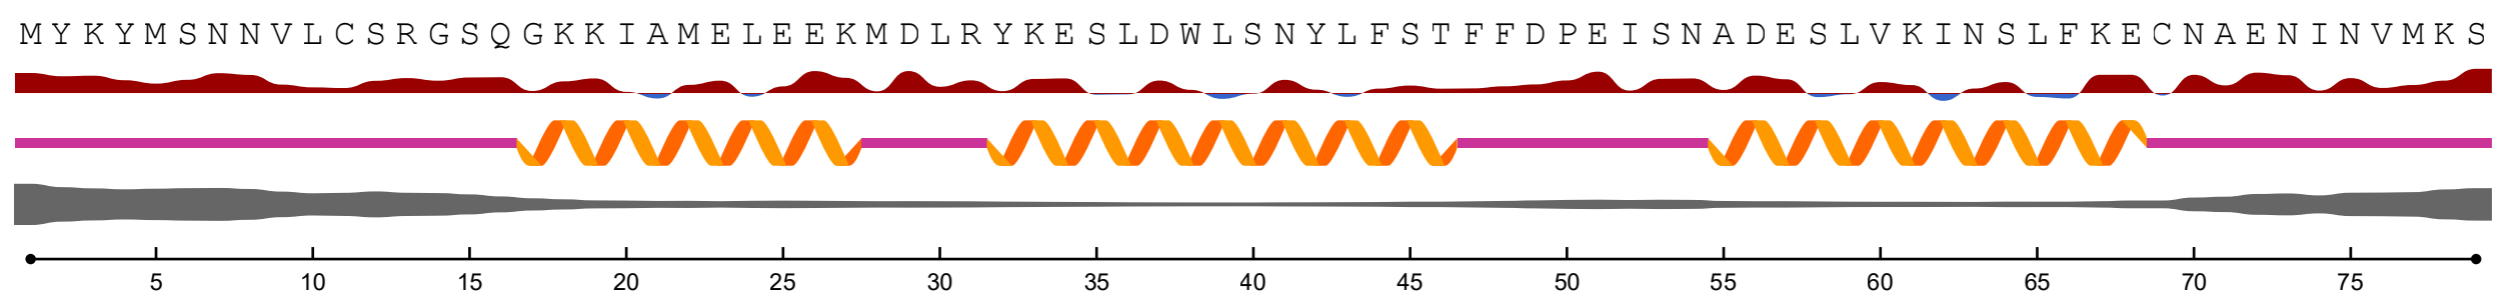

*Scapharca inaequalvis* ORF21

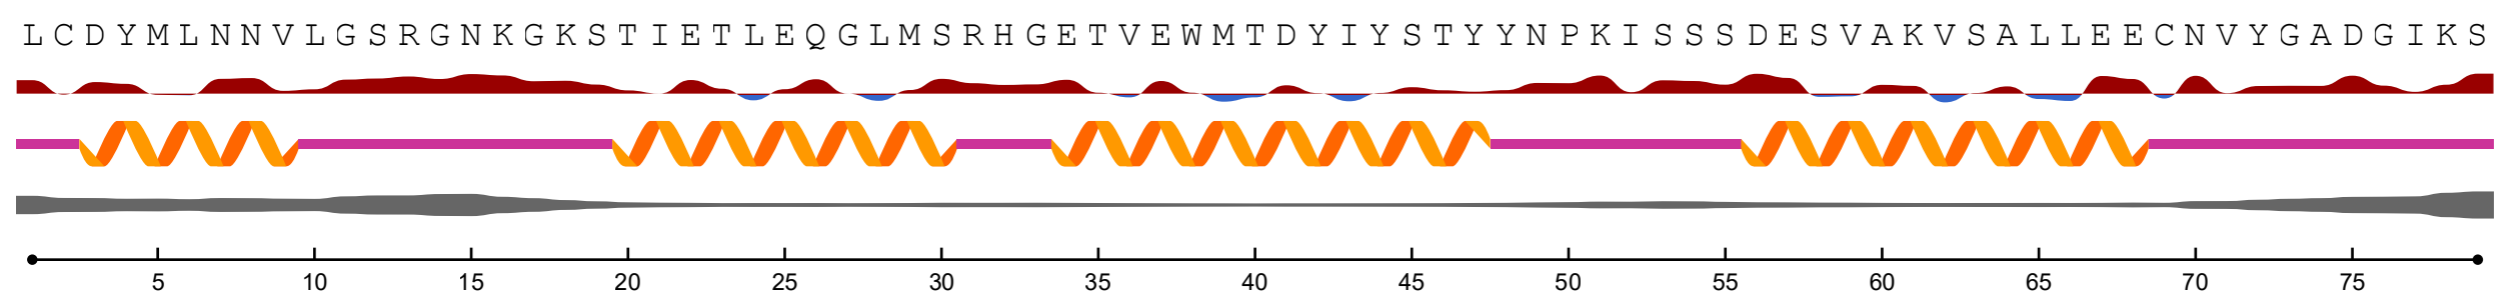

*Scapharca broughtonii* ORF103

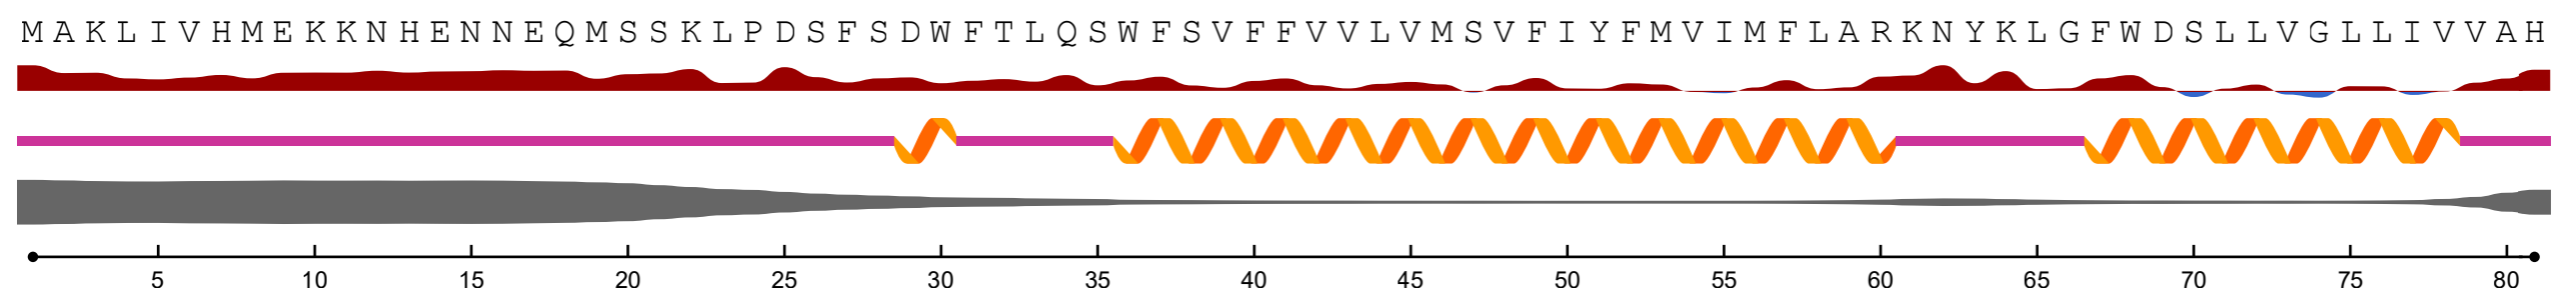

*Scapharca kagoshimensis* ORF103

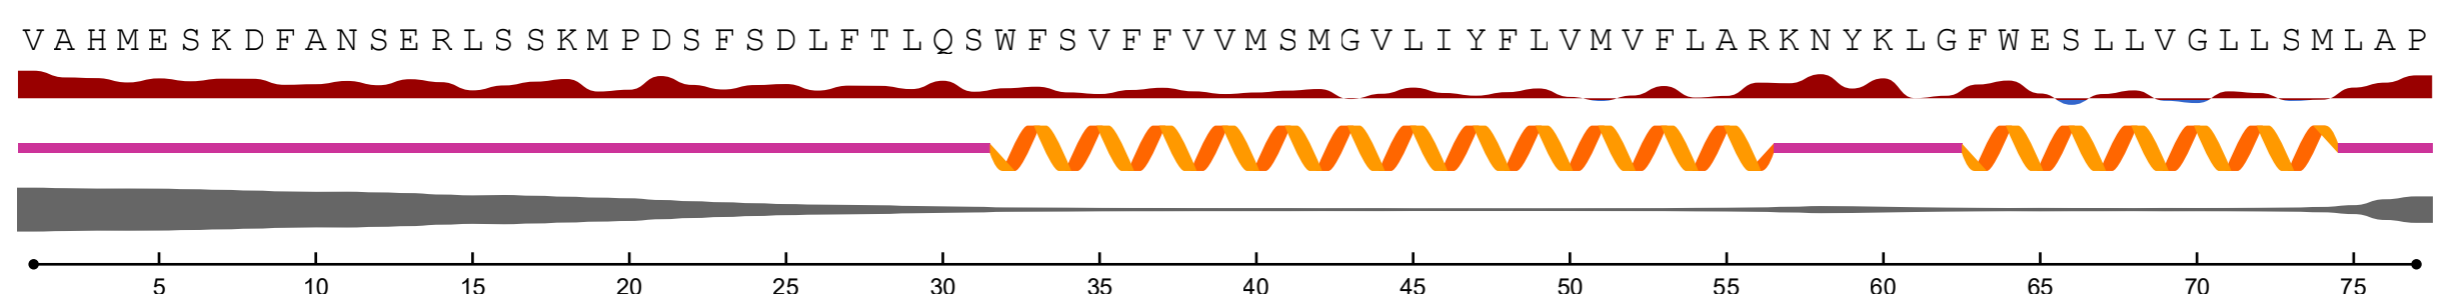

*Scapharca cornea* ORF103

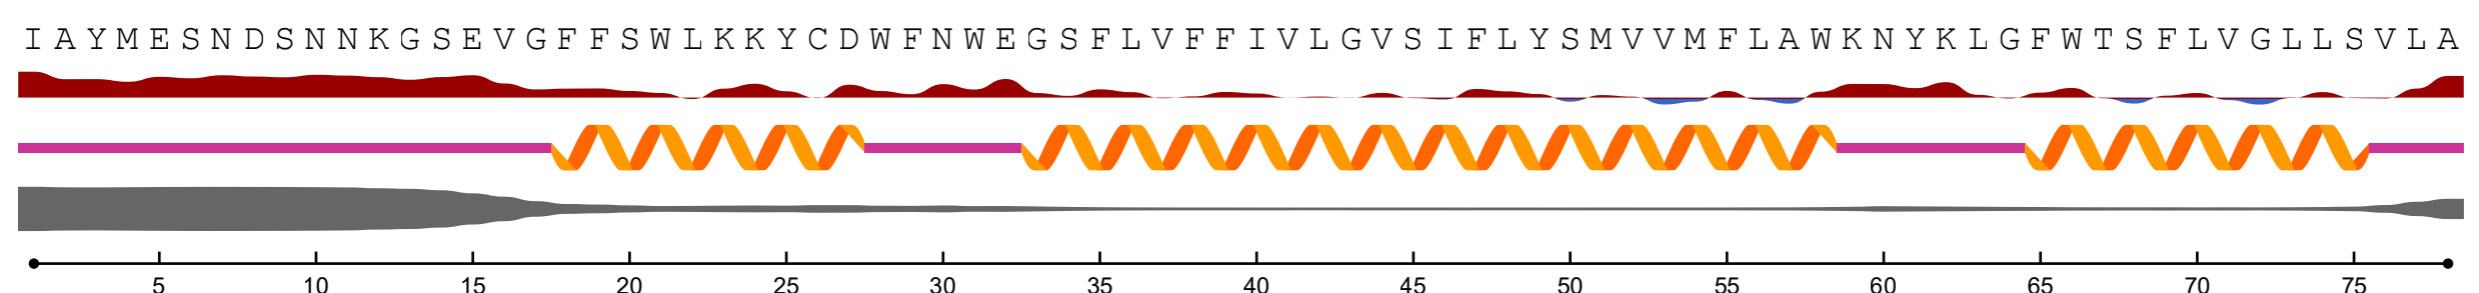

*Scapharca inaequalvis* ORF103

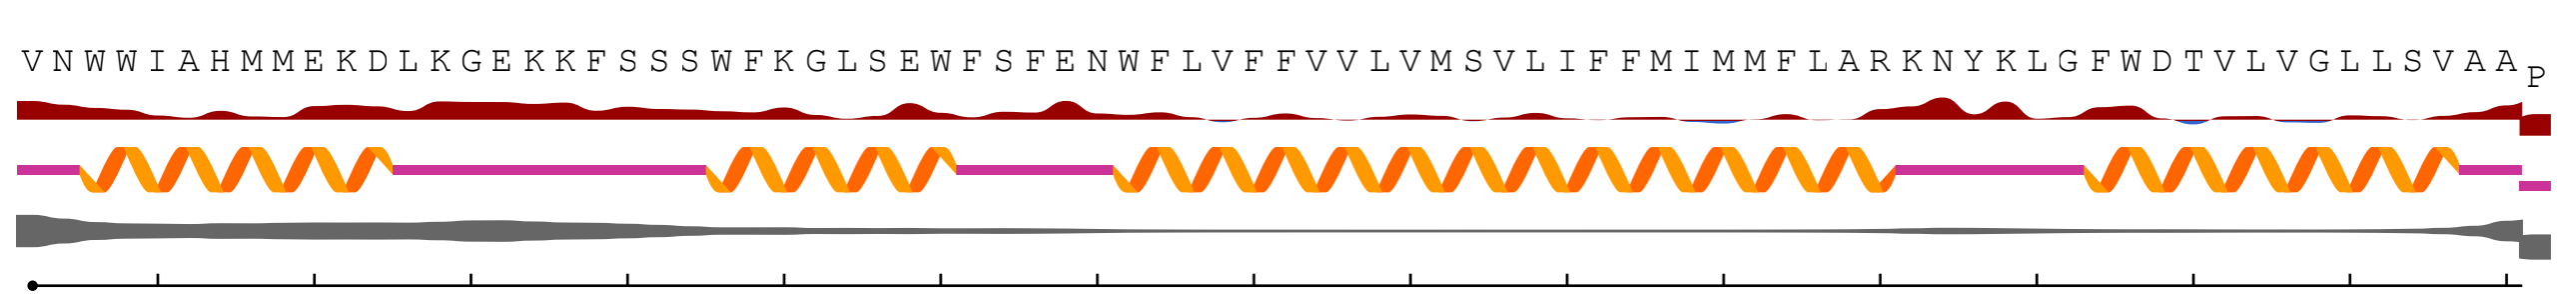

Supplement: 12864_2022_9040_MOESM7_ESM.pdf [file 12864_2022_9040_MOESM7_ESM.pdf]
