# Supplementary material for: A comparative analysis of mitochondrial ORFs provides new insights on expansion of mitochondrial genome size in Arcidae
Source: PubMed Central journal article supplement (PMC9727918; doi:10.1186/s12864-022-09040-3), 2022-12-07
Supplement: 12864_2022_9040_MOESM2_ESM.pdf [file 12864_2022_9040_MOESM2_ESM.pdf]

## Additional file 2: R pipeline and TPM file

### R pipeline for FPKM calculation:

```
count <- read.csv("count_with_length.csv")
```

```
count <- count[,-1]
```

```
kb <- count$Length/1000
```

```
countdata <- count[,2 : 4]
```

```
rpkm <- countdata/kb
```

```
tpm <- t(t(rpkm)/colSums(rpkm) * 1000000)
```

```
write.csv(tpm,file="tpm_genesandORFs.csv")
```

**count\_with\_length.csv (Mapped read counts ) and tpm\_genesandORFs.csv (TPM value ) are showed on the next page.**

count\_with\_length.csv: the file from featureCounts results

|    | gene   | S1     | S2     | S3     | Length |
|----|--------|--------|--------|--------|--------|
| 1  | Cox1   | 86763  | 157084 | 128635 | 1584   |
| 2  | Cox2   | 149761 | 181509 | 133546 | 720    |
| 3  | Cox3   | 105054 | 136760 | 90154  | 759    |
| 4  | Nad3   | 70740  | 92613  | 80090  | 408    |
| 5  | Nad4L  | 42299  | 40874  | 39562  | 276    |
| 6  | Nad5   | 197872 | 345288 | 260600 | 1707   |
| 7  | Nad6   | 115585 | 202194 | 158946 | 468    |
| 8  | Atp6   | 38551  | 66625  | 28215  | 675    |
| 9  | Cob    | 53102  | 105341 | 68664  | 1278   |
| 10 | Nad1   | 39127  | 55001  | 34846  | 975    |
| 11 | Nad2   | 27339  | 72259  | 23435  | 1059   |
| 12 | Nad4   | 26957  | 38519  | 27971  | 1296   |
| 13 | ORF87  | 4265   | 8519   | 6538   | 1983   |
| 14 | ORF40  | 6937   | 11861  | 7145   | 819    |
| 15 | ORF104 | 495    | 437    | 255    | 513    |
| 16 | ORF8   | 12648  | 18169  | 4873   | 609    |
| 17 | ORF11  | 7374   | 6036   | 6839   | 603    |
| 18 | ORF10  | 2894   | 2486   | 1827   | 585    |
| 19 | ORF127 | 1912   | 1624   | 1472   | 1809   |
| 20 | ORF5   | 5270   | 10275  | 8399   | 762    |
| 21 | ORF86  | 6014   | 3166   | 3494   | 582    |
| 22 | ORF21  | 3493   | 1437   | 3223   | 239    |
| 23 | ORF103 | 489    | 355    | 239    | 246    |

tpm\_genesandORFs.csv: the TPM file from R pipeline result

|        | S1          | S2          | S3          |
|--------|-------------|-------------|-------------|
| Cox1   | 40218.96116 | 50376.80365 | 55576.6823  |
| Cox2   | 152727.661  | 128061.7705 | 126936.6498 |
| Cox3   | 101630.0836 | 91531.62031 | 81289.0164  |
| Nad3   | 127308.1943 | 115309.6419 | 134340.4425 |
| Nad4L  | 112531.0792 | 75230.14393 | 98097.4686  |
| Nad5   | 85114.25226 | 102754.7243 | 104479.1268 |
| Nad6   | 181345.6281 | 219470.5465 | 232430.1133 |
| Atp6   | 41935.64633 | 50140.34102 | 28606.51321 |
| Cob    | 30509.2471  | 41871.68298 | 36769.42934 |
| Nad1   | 29466.15035 | 28656.27948 | 24458.90221 |
| Nad2   | 18955.62597 | 34661.69697 | 15144.59423 |
| Nad4   | 15272.77743 | 15098.1535  | 14770.37888 |
| ORF87  | 1579.238733 | 2182.32656  | 2256.37275  |
| ORF40  | 6219.267811 | 7356.83877  | 5970.448759 |
| ORF104 | 708.4990947 | 432.7308981 | 340.1821012 |
| ORF8   | 15249.51495 | 15155.40569 | 5476.054513 |
| ORF11  | 8979.192597 | 5084.939067 | 7761.826587 |
| ORF10  | 3632.403843 | 2158.733805 | 2137.328738 |
| ORF127 | 776.0698059 | 456.0382729 | 556.8752126 |
| ORF5   | 5078.168529 | 6849.844197 | 7543.297809 |
| ORF86  | 7587.381214 | 2763.387317 | 4108.549843 |
| ORF21  | 10731.29542 | 3054.307097 | 9228.923554 |
| ORF103 | 1459.570973 | 733.0727568 | 664.8925057 |
