# Supplementary material for: A comparative analysis of mitochondrial ORFs provides new insights on expansion of mitochondrial genome size in Arcidae
Source: PubMed Central journal article supplement (PMC9727918; doi:10.1186/s12864-022-09040-3), 2022-12-07

### ORF46:

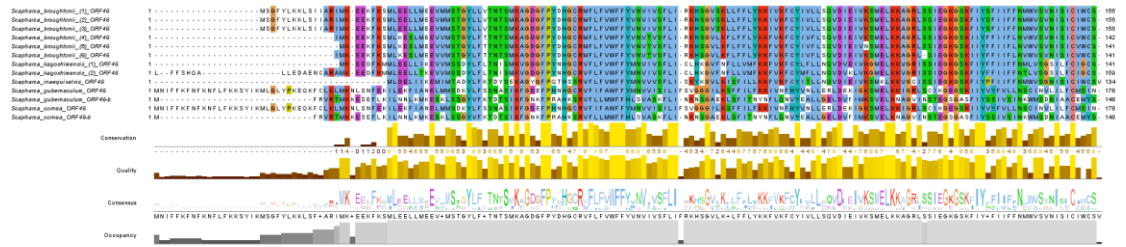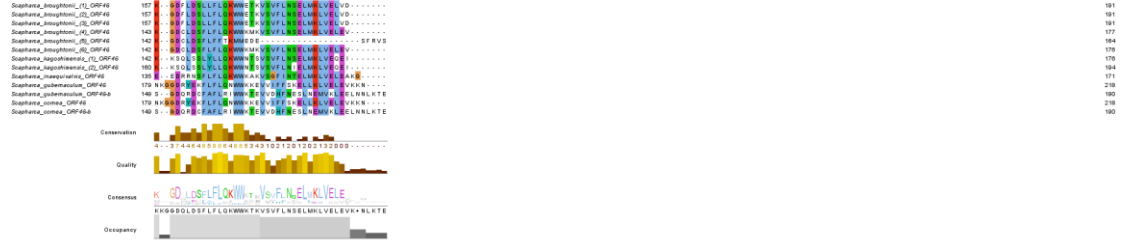

### ORF49:

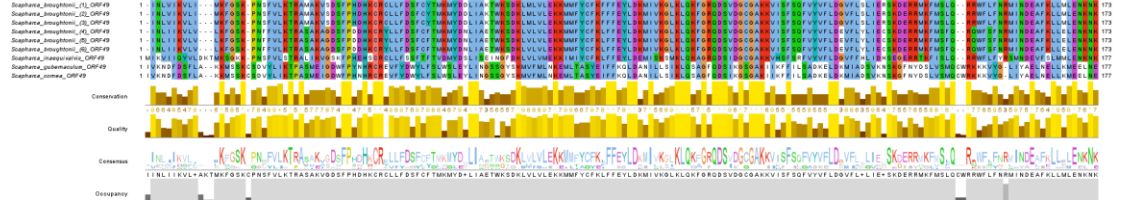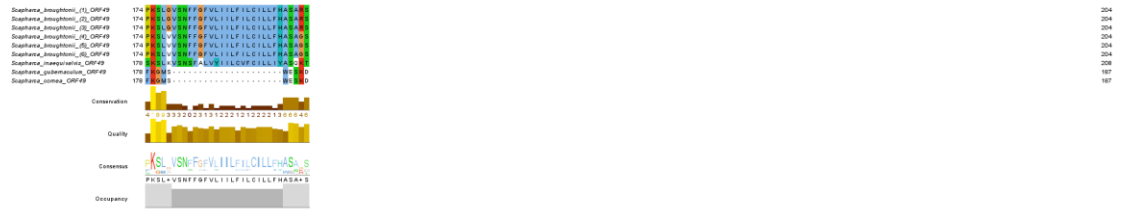

### ORF78:

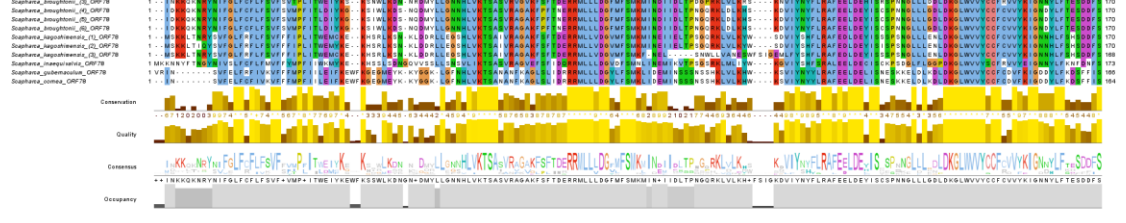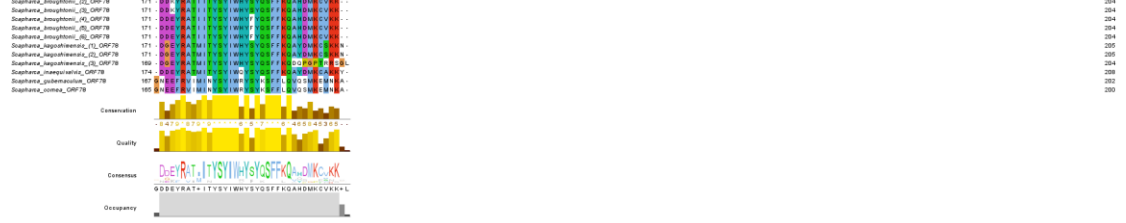

# ORF86:

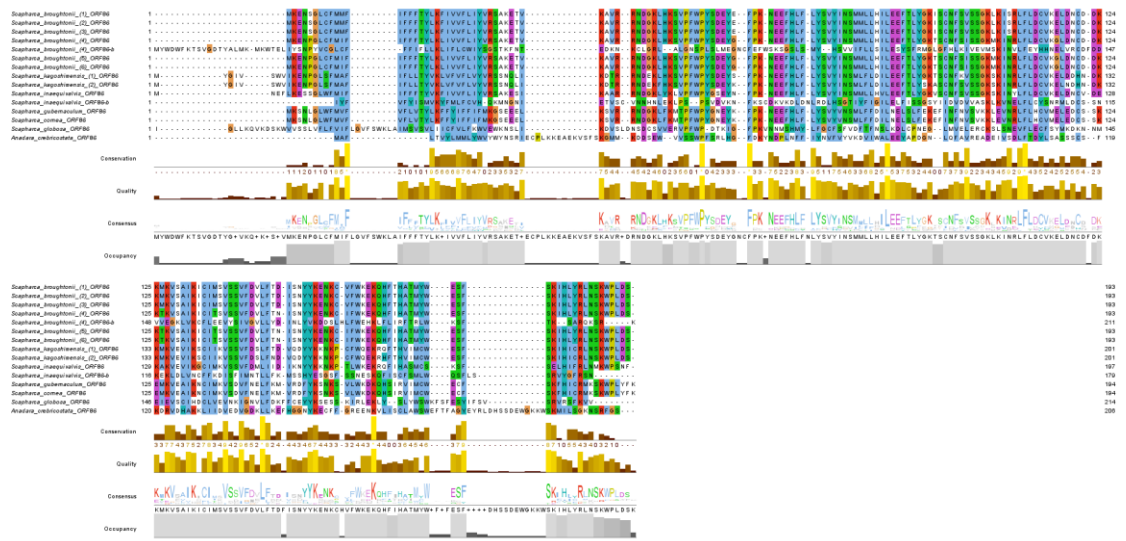





# ORF127:

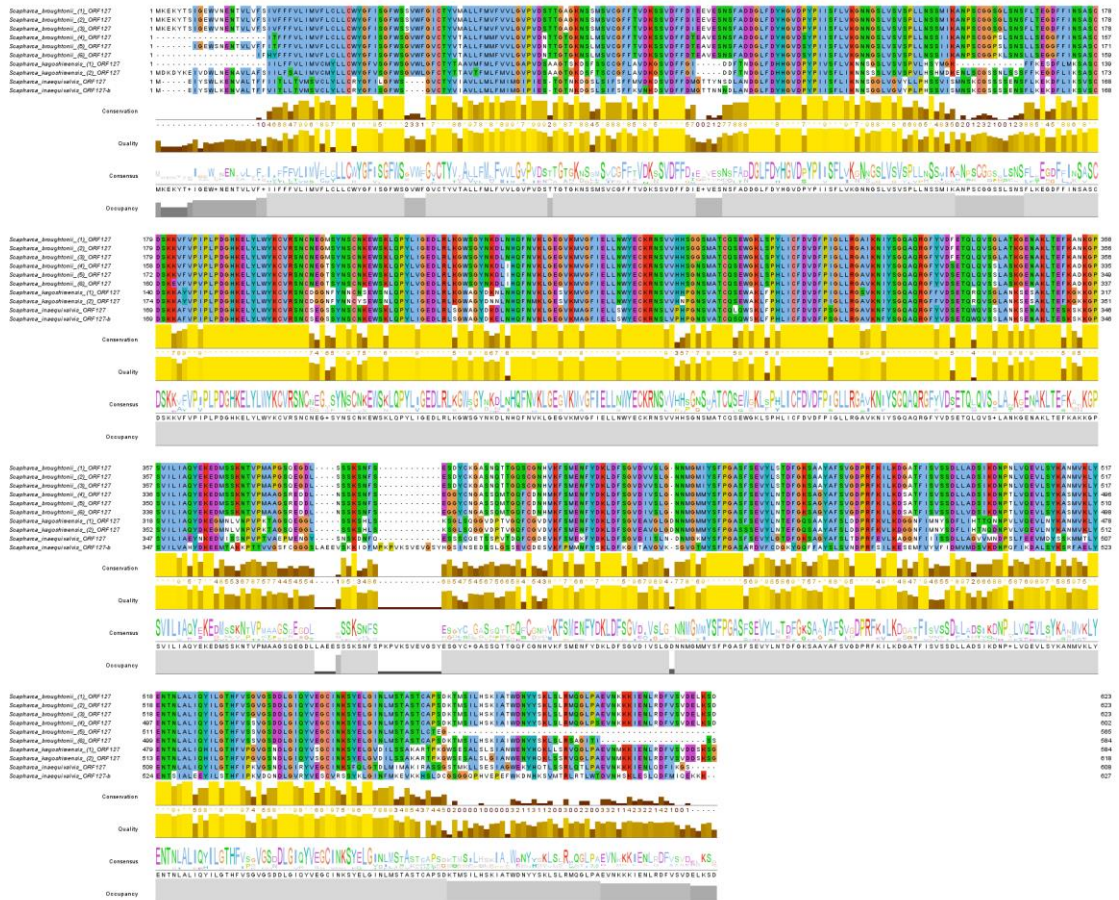

# ORF21:

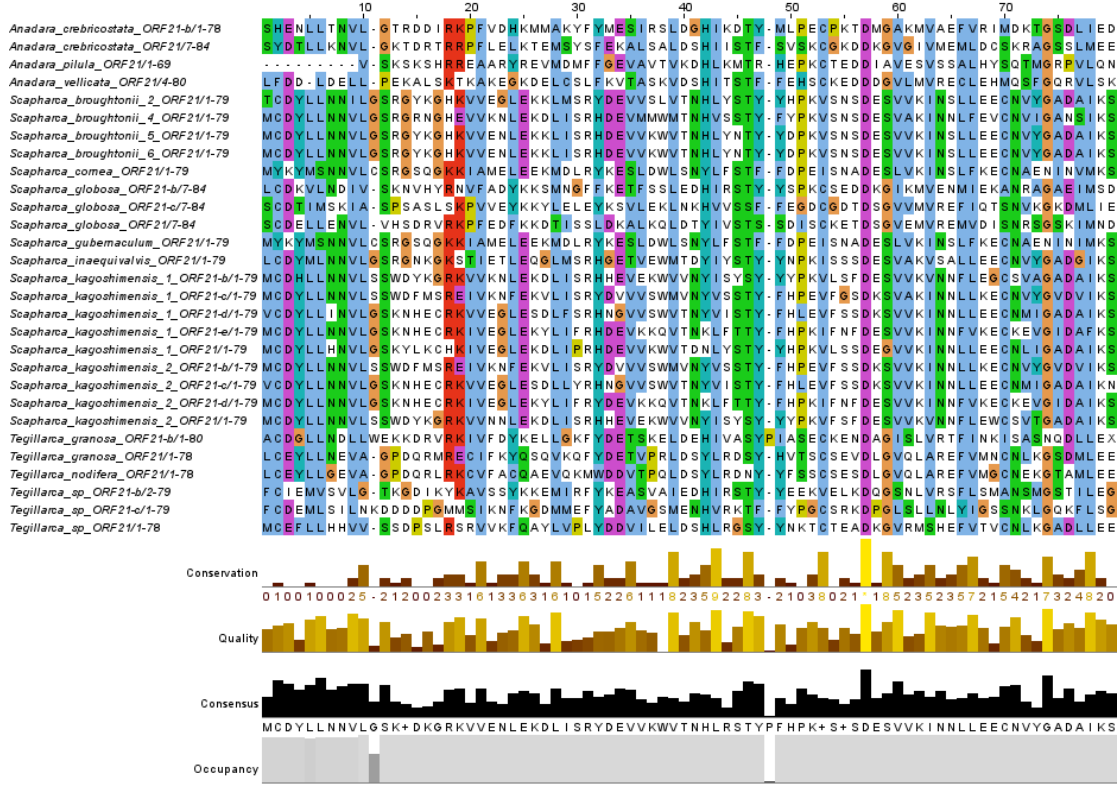

# ORF103:

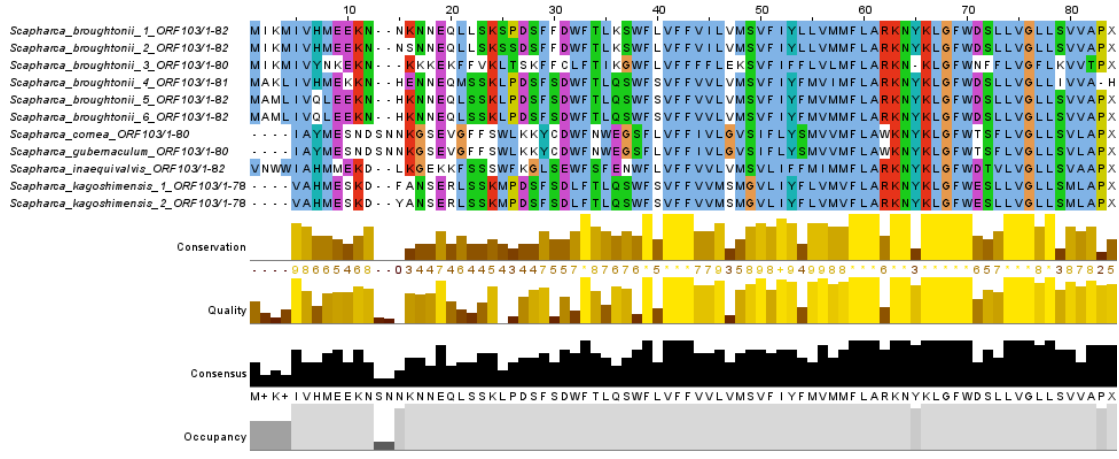

Supplement: 12864_2022_9040_MOESM4_ESM.pdf [file 12864_2022_9040_MOESM4_ESM.pdf]
