# Supplementary material for: A comparative analysis of mitochondrial ORFs provides new insights on expansion of mitochondrial genome size in Arcidae
Source: PubMed Central journal article supplement (PMC9727918; doi:10.1186/s12864-022-09040-3), 2022-12-07
Supplement: 12864_2022_9040_MOESM6_ESM.pdf [file 12864_2022_9040_MOESM6_ESM.pdf]

# Additional file 6: the tree of ORF7, ORF8, ORF78 and ORF11

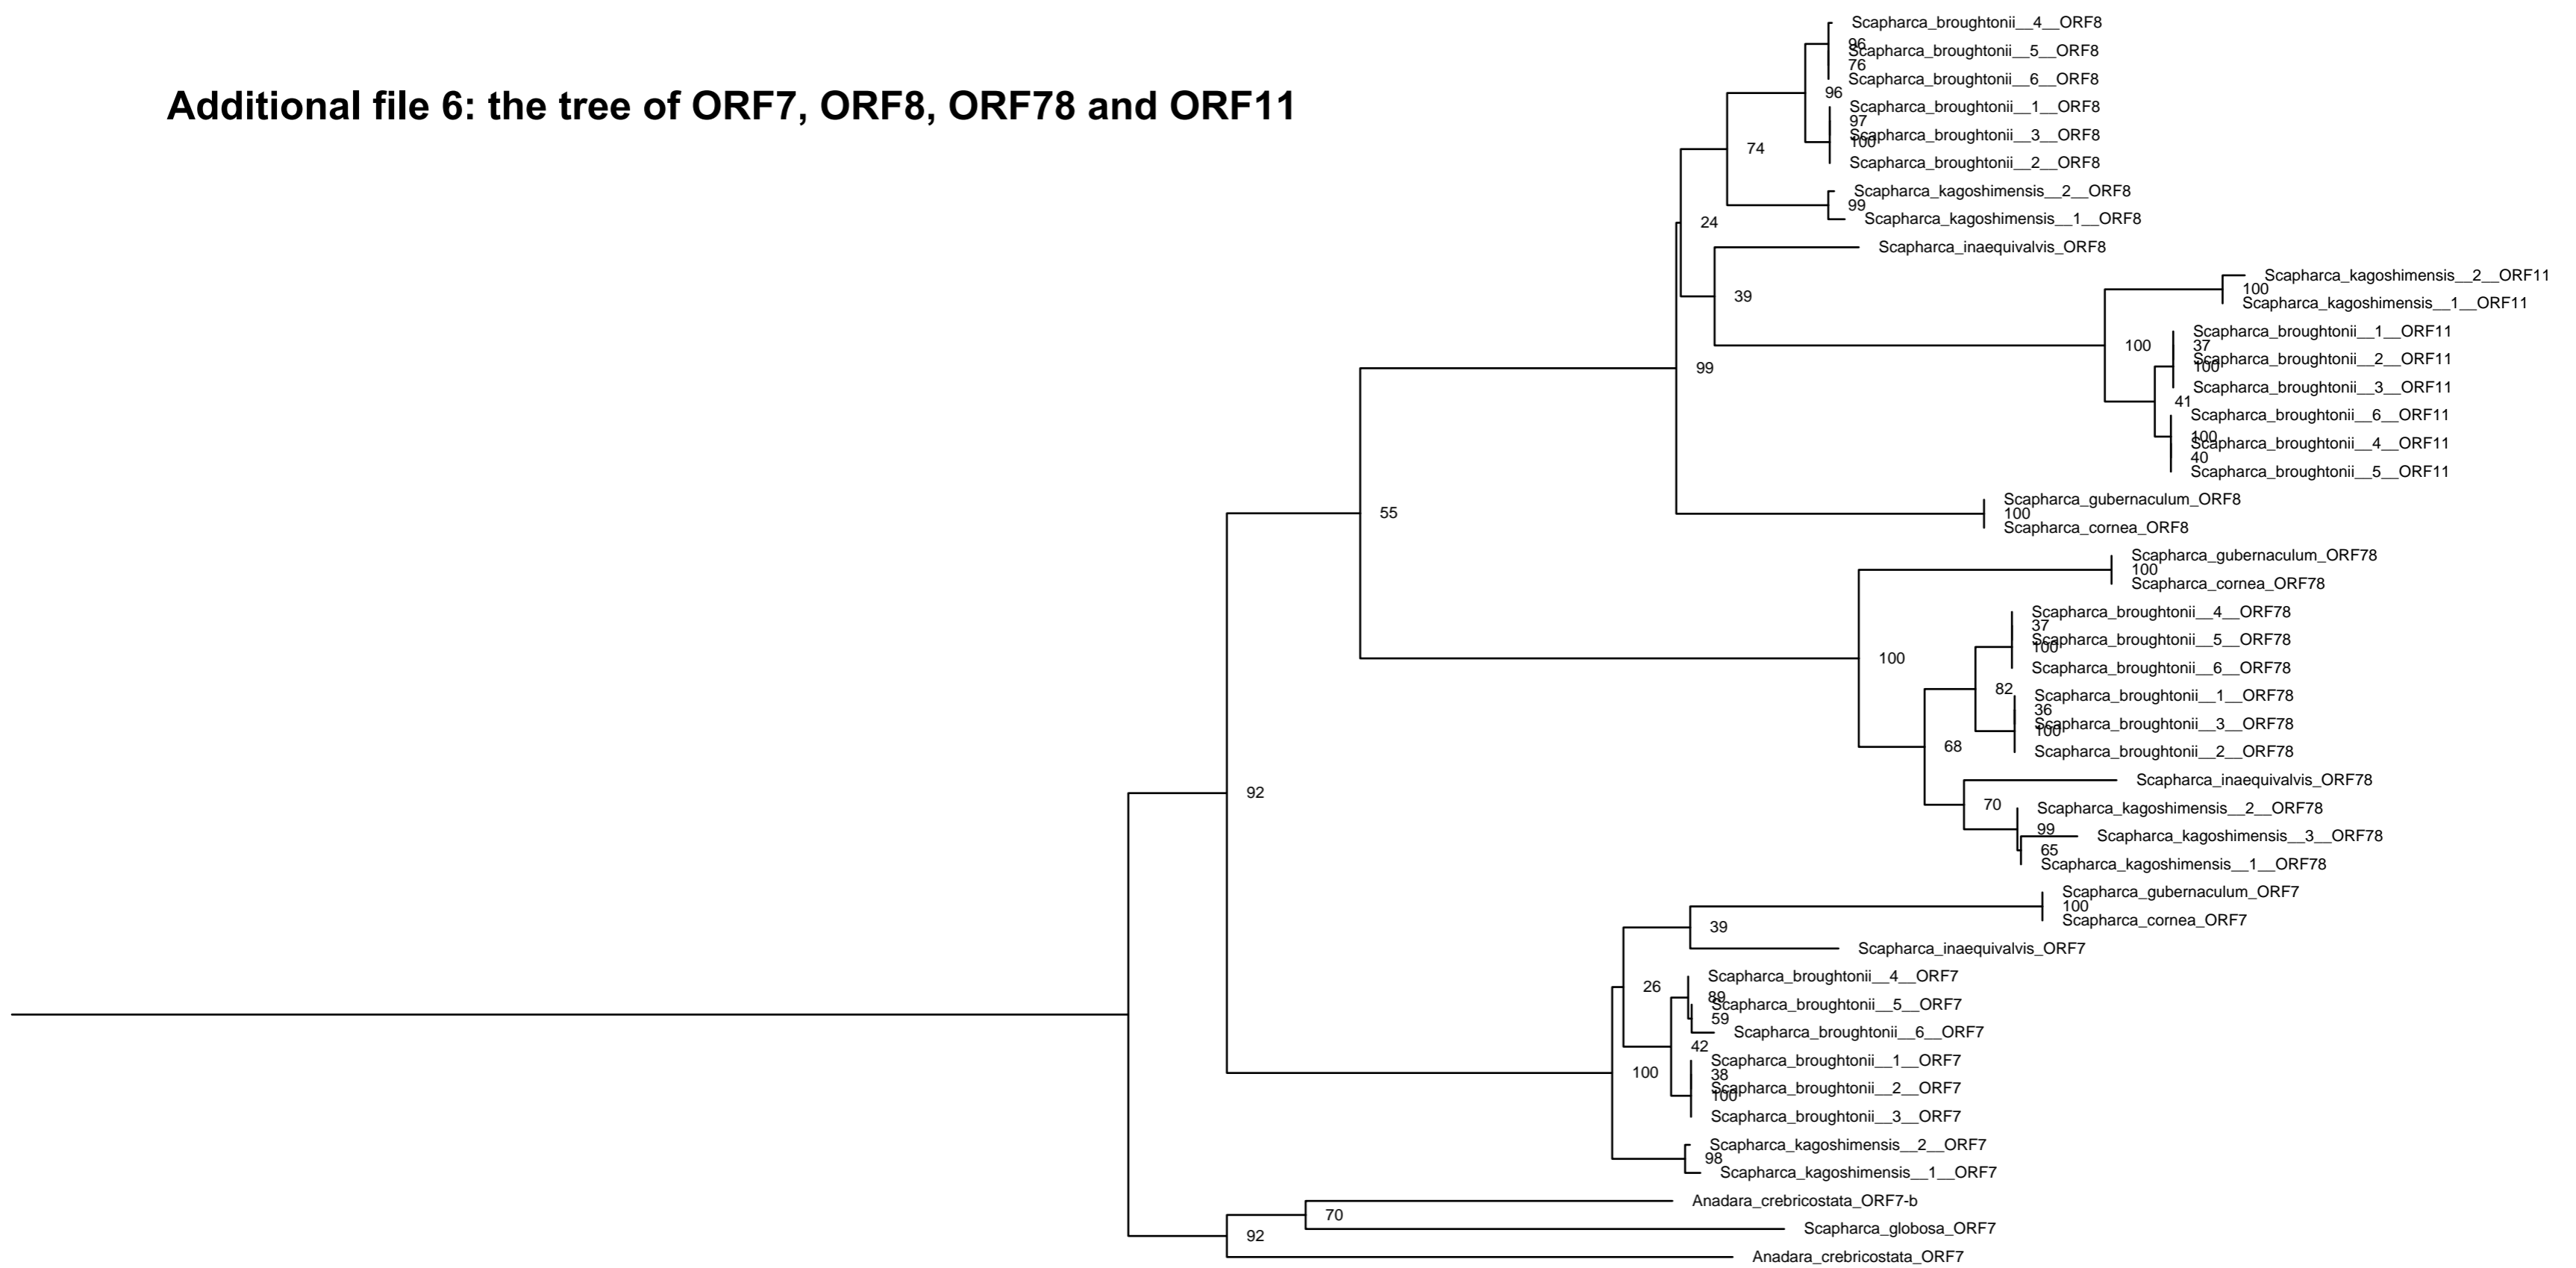

# Additional file 4: the tree of ORF104, ORF106, ORF46 and ORF49

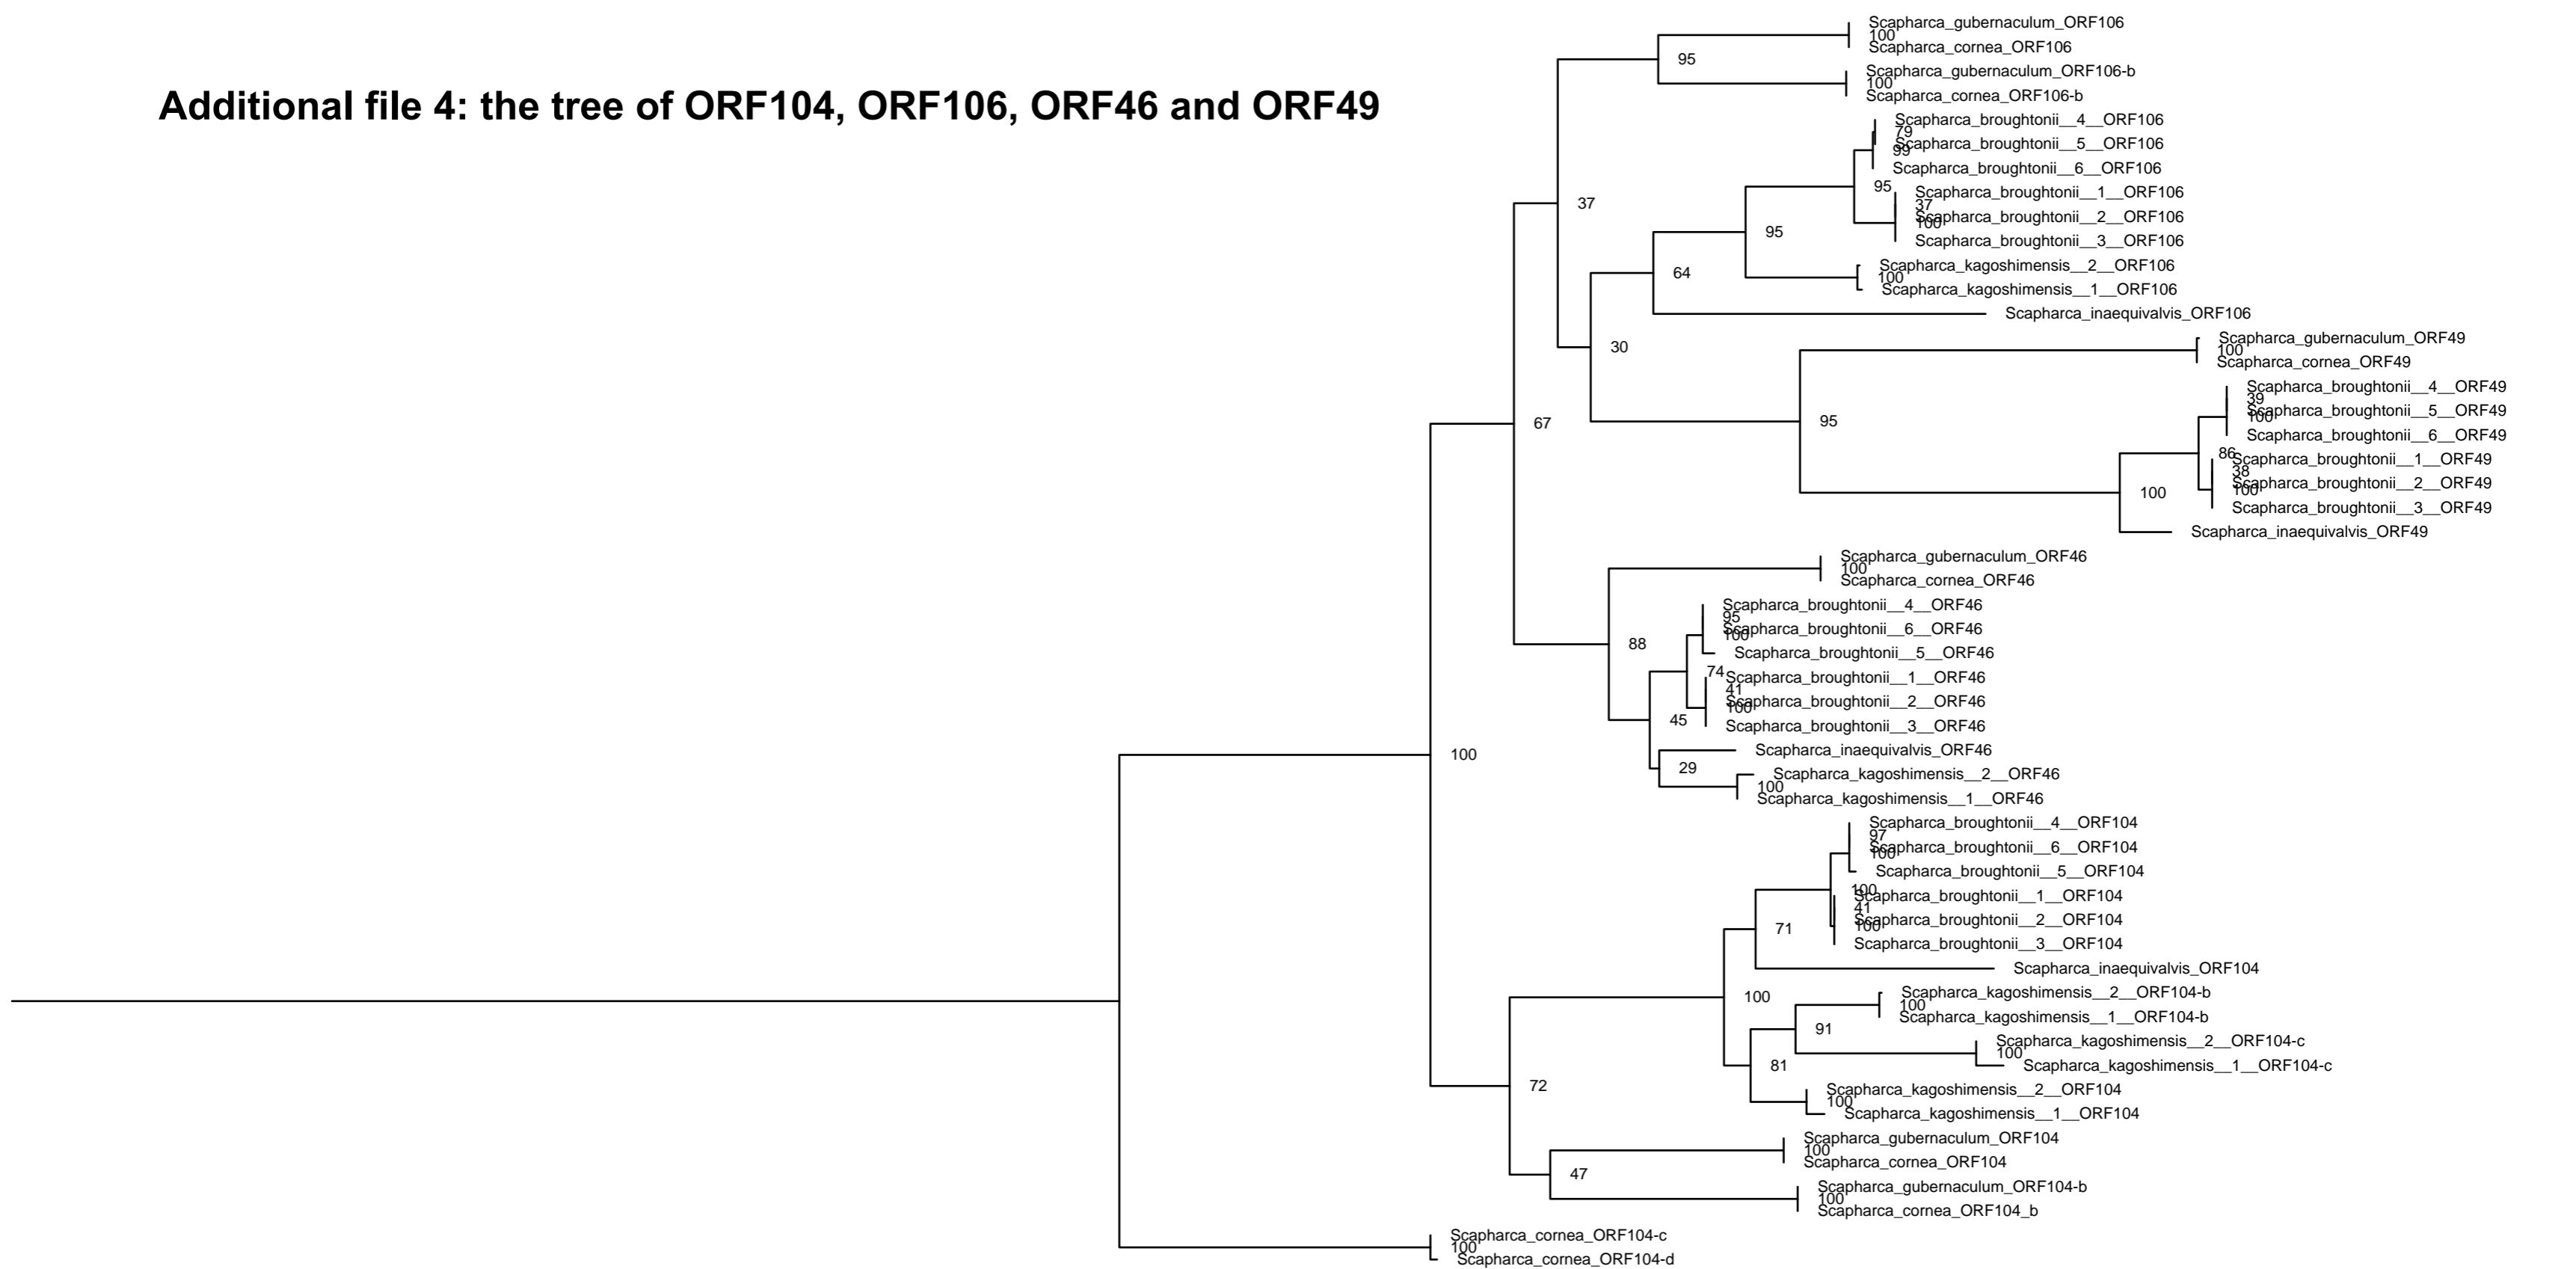

0.4

# Additional file 4: the tree of ORF87 and ORF127

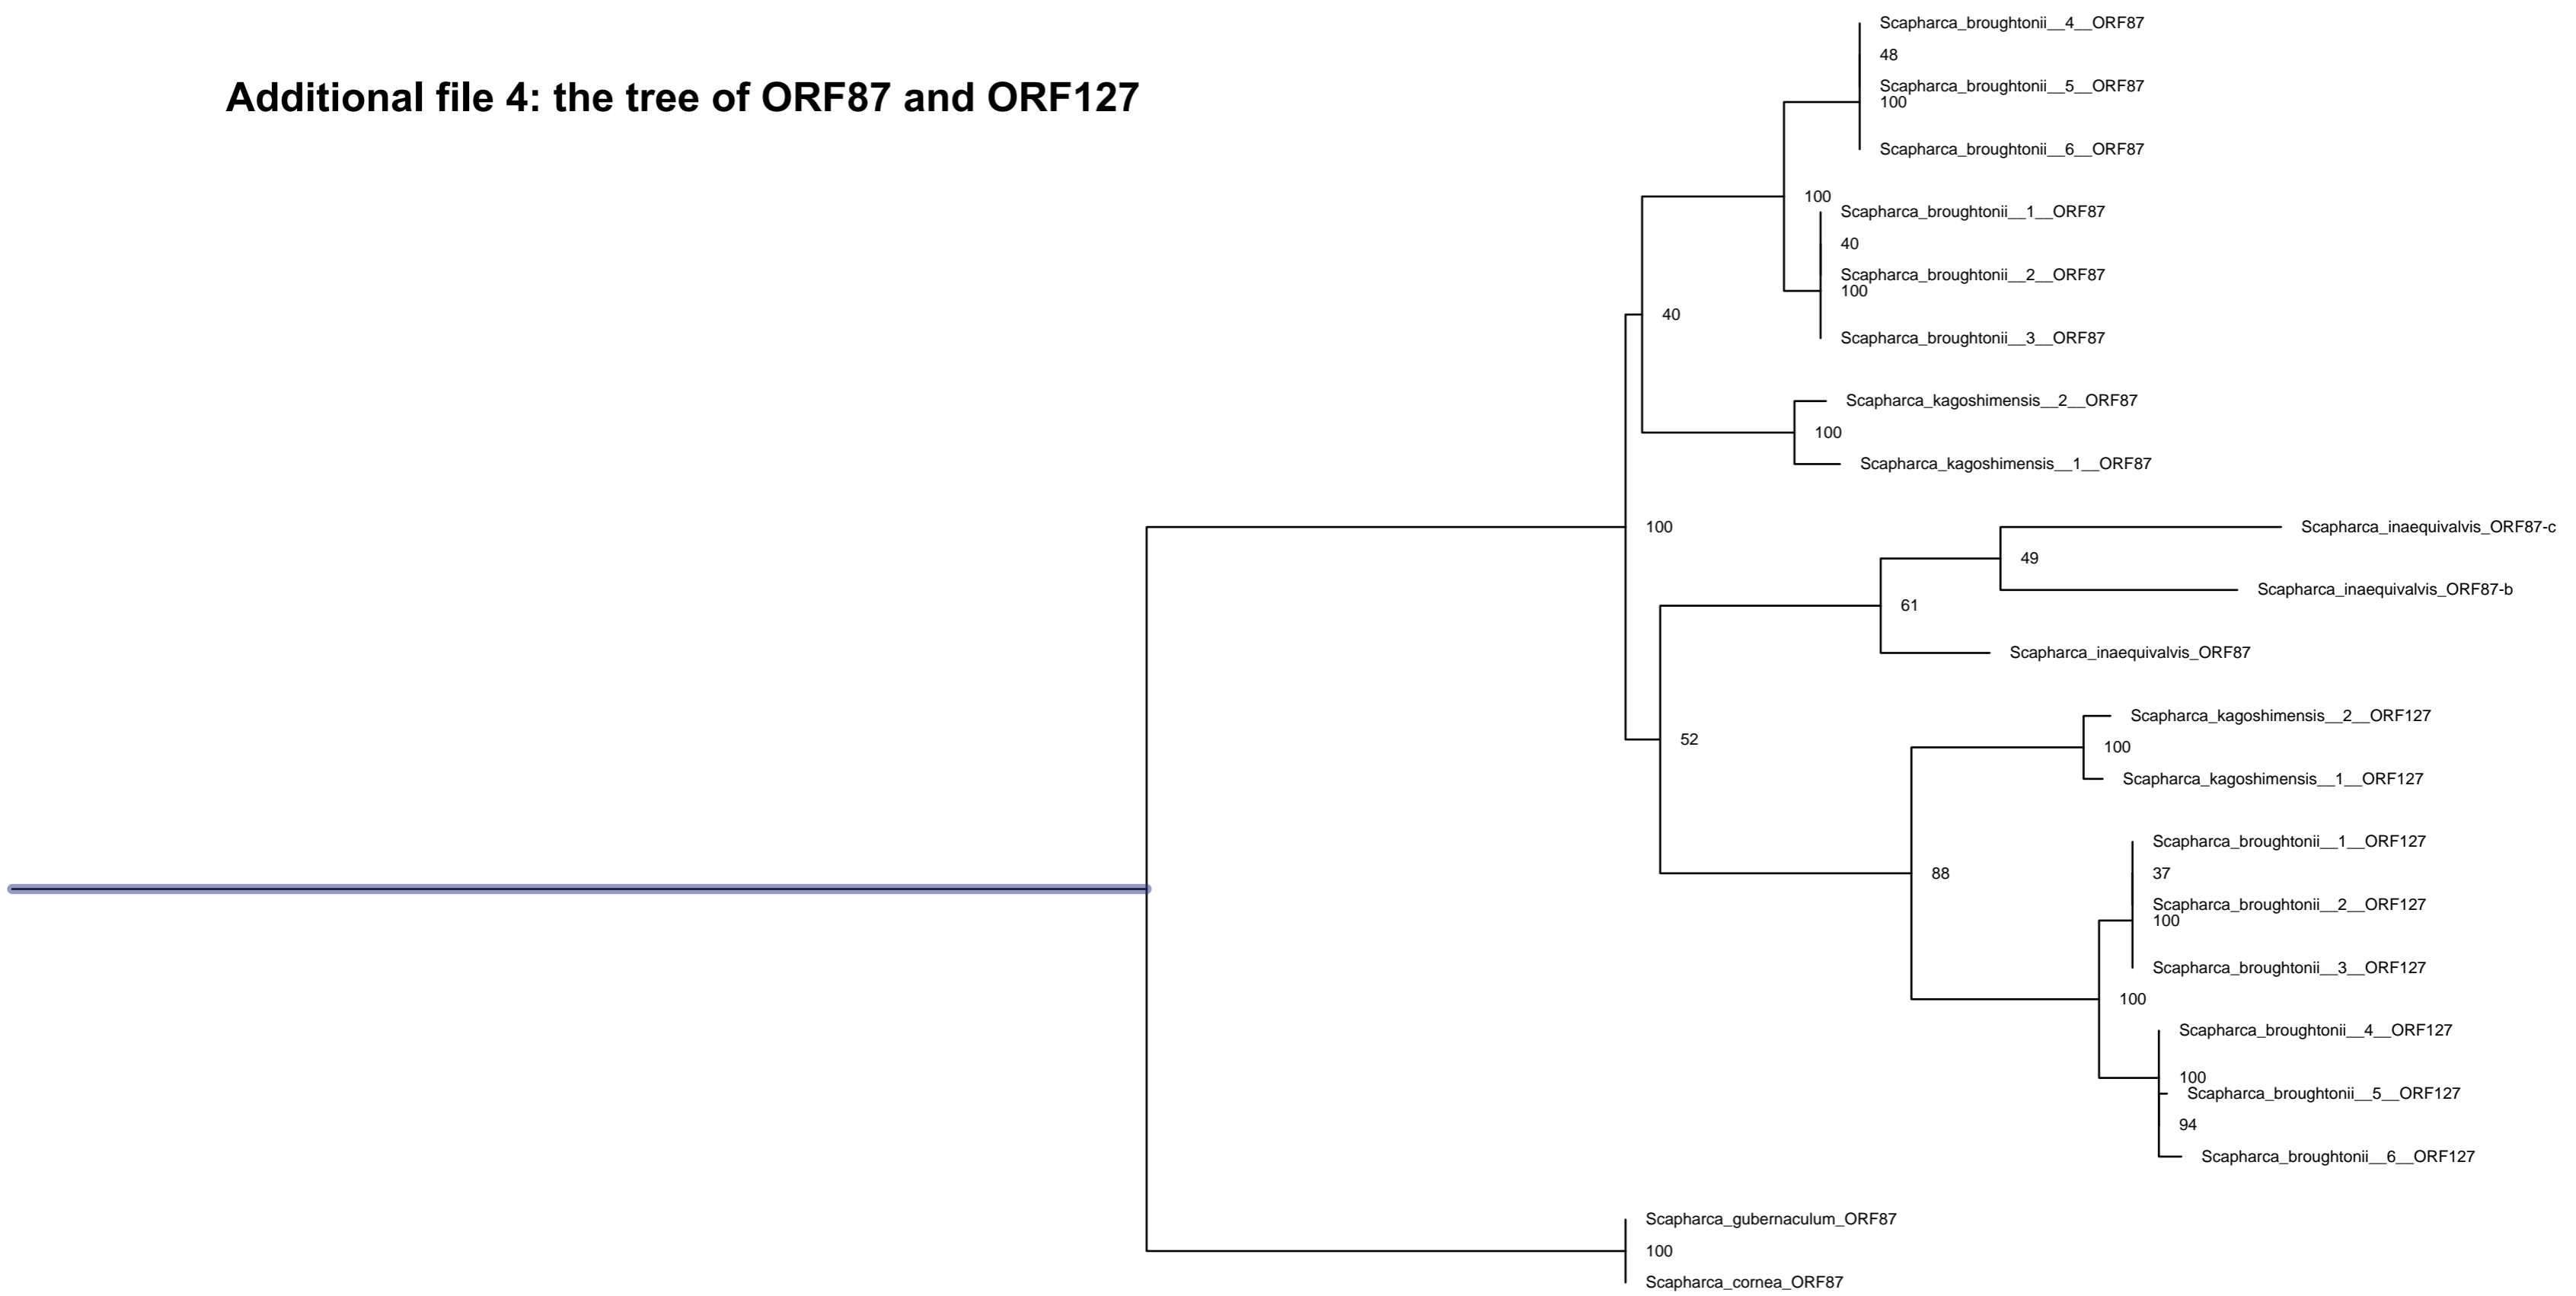

0.2
